# Supplementary material for: SERS detection of microRNA biomarkers for cancer diagnosis using gold-coated paramagnetic nanoparticles to capture SERS-active gold nanoparticles
Source: Royal Society of Chemistry journal article supplement (doi:10.1039/c7ra10918k), 2017-01-01
Supplement: c7ra10918k1.pdf [file c7ra10918k1.pdf]

## Supplementary materials

### SERS Detection of MicroRNA Biomarkers for Cancer Diagnosis Using Gold-Coated Paramagnetic Nanoparticles to Capture SERS-active Gold Nanoparticles

Hao Zhang<sup>\*a</sup>, Yu Yi<sup>b</sup>, Chunhui Zhou<sup>a</sup>, Guoqing Ying<sup>b</sup>, Xiangdong Zhou<sup>a</sup>, Chaopeng Fu<sup>a</sup>, Yifeng Zhu<sup>\*a</sup> and Youqing Shen<sup>\*c</sup>

<sup>a</sup> College of Chemical Engineering, Zhejiang University of Technology, Hangzhou 310014, China

<sup>b</sup> College of Pharmaceutical Science, Zhejiang University of Technology, Hangzhou 310014, China

<sup>c</sup> College of Chemical and Biological Engineering, Zhejiang University, Hangzhou 310027, China

**Table S1.** Sequences of oligonucleotides used in this work

| Name                                              | Sequence                                      |
|---------------------------------------------------|-----------------------------------------------|
| miR-141 (target sequence)                         | 5'UAA CAC UGU CUG GUA AAG AUG G3'             |
| Reporter probe (5'-amino modified reporter probe) | NH <sub>2</sub> -5'TTTTTTTTTT C CAT CTT TAC3' |
| Capture probe (3'-thiol modified capture probe)   | 5'AGA CAG TGT TA TTTTTTTTTT3'-SH              |
| miR-429 (nonspecific target sequence)             | 5'UAA UAC UGU CUG GUA AAA CCG U3'             |

## Supplementary materials

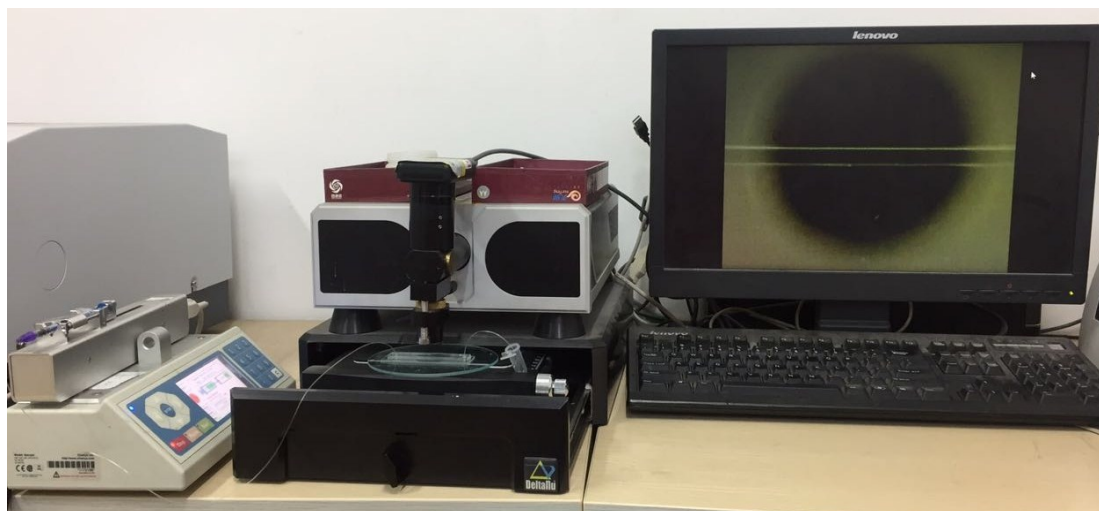

**Fig. S1** Raman spectrometer equipped with a camera for focusing laser on sample pellets and Bright-field imaging of nanoparticle pellets concentrated in the microfluidic channel by a small external magnet.
